# Supplementary material for: Infectious Morbidity in Pediatric Patients Receiving Neoadjuvant Chemotherapy for Sarcoma
Source: MDPI journal article supplement (doi:10.3390/cancers13091990), 2021-04-21
Supplement: s1 [file s1]

# Supplementary Material: Infectious Morbidity in Pediatric Patients Receiving Neoadjuvant Chemotherapy for Sarcoma

Denise Willmer, Stefan K. Zöllner, Frieder Schaumburg, Heribert Jürgens, Thomas Lehrnbecher and Andreas H. Groll

**Table S1.** Overview of 21 blood stream infections in 19 patients.

|                             | Pathogen                                                 | Sex                                 | Age                 | Diagnosis        | Course            |                                 |
|-----------------------------|----------------------------------------------------------|-------------------------------------|---------------------|------------------|-------------------|---------------------------------|
| Gram positive               | <i>Staphylococcus epidermidis</i>                        | male                                | 13                  | Ewing sarcoma    | VIDE              |                                 |
|                             | <i>Staphylococcus epidermidis</i>                        | female <sup>1</sup>                 | 14                  | Ewing sarcoma    | VIDE              |                                 |
|                             | <i>Staphylococcus epidermidis</i>                        | male                                | 11                  | Ewing sarcoma    | VIDE              |                                 |
|                             | <i>Staphylococcus epidermidis</i>                        | female                              | 11                  | Ewing sarcoma    | VIDE              |                                 |
|                             | <i>Staphylococcus epidermidis</i>                        | female                              | 0                   | Rhabdomyosarcoma | I <sup>2</sup> VA |                                 |
|                             | <i>Staphylococcus epidermidis</i>                        | male                                | 5                   | Rhabdomyosarcoma | I <sup>2</sup> VA |                                 |
|                             | <i>Staphylococcus epidermidis</i>                        | female                              | 7                   | Rhabdomyosarcoma | I <sup>2</sup> VA |                                 |
|                             | <i>Staphylococcus haemolyticus</i>                       | male                                | 17                  | Osteosarcoma     | M                 |                                 |
|                             | streptococci                                             | <i>Streptococcus mitis</i>          | male <sup>2</sup>   | 16               | Ewing sarcoma     | VIDE                            |
|                             | enterococci                                              | <i>Enterococcus faecalis</i>        | male                | 0                | PNET              | VIDE                            |
|                             |                                                          | <i>Enterococcus faecalis</i>        | female              | 10               | Ewing sarcoma     | VIDE                            |
|                             |                                                          | <i>Enterococcus faecium</i>         | male                | 6                | Ewing sarcoma     | VIDE                            |
|                             |                                                          | <i>Micrococcus luteus</i>           | female              | 14               | Ewing sarcoma     | VIDE                            |
|                             | other                                                    | <i>Brevibacterium borstelensis</i>  | female              | 18               | Ewing sarcoma     | VIDE                            |
| <i>Brevibacterium casei</i> |                                                          | male <sup>2</sup>                   | 16                  | Ewing sarcoma    | VIDE              |                                 |
| Gram negative               | enterobacterales                                         | <i>Escherichia coli</i>             | female              | 12               | Ewing sarcoma     | VIDE                            |
|                             |                                                          | <i>Klebsiella pneumoniae</i> (ESBL) | female              | 18               | Rhabdomyosarcoma  | I <sup>2</sup> VAd <sup>2</sup> |
|                             |                                                          | <i>Enterobacter cloacae</i> complex | female              | 1                | Rhabdomyosarcoma  | I <sup>2</sup> VA               |
|                             | other                                                    | <i>Moraxella osloensis</i>          | male                | 11               | Ewing sarcoma     | VIDE                            |
| Mixed                       | <i>Micrococcus luteus, Paracoccus yecii</i>              |                                     | female <sup>1</sup> | 14               | Ewing sarcoma     | VIDE                            |
|                             | <i>Staphylococcus hominis, Klebsiella oxycota</i> (ESBL) |                                     | male                | 8                | Ewing sarcoma     | VIDE                            |

CoNS, coagulase negative staphylococci; ESBL, extended-spectrum  $\beta$ -lactamase; V, vincristine; I, ifosfamid; D, doxorubicin; E, etoposide; A, actinomycin D; M, methotrexate; Ad, adriamycin <sup>1</sup> same patient; <sup>2</sup> same patient.

**Table S2.** Bivariate analysis of potential factors associated to the number of FN episodes during neoadjuvant chemotherapy in 170 patients.

| Characteristic             | Median Number of FN Episodes (Range) | p-value              |
|----------------------------|--------------------------------------|----------------------|
| Sex                        |                                      | 0.127 <sup>a</sup>   |
| male                       | 1.0 (0–6)                            |                      |
| female                     | 1.0 (0–6)                            |                      |
| Any metastases             |                                      | 0.942 <sup>a</sup>   |
| no                         | 1.0 (0–6)                            |                      |
| yes                        | 1.0 (0–6)                            |                      |
| Treatment regimen          |                                      | < 0.001 <sup>b</sup> |
| EWING 2008                 | 3.0 (0–6)                            |                      |
| EURAMOS                    | 0.0 (0–3)                            |                      |
| CWS SoTiSaR                | 1.0 (0–6)                            |                      |
| EWING 2008 vs. EURAMOS     |                                      | < 0.001 <sup>c</sup> |
| EWING 2008 vs. CWS SoTiSaR |                                      | < 0.001 <sup>c</sup> |
| EURAMOS vs. CWS SoTiSaR    |                                      | < 0.001 <sup>c</sup> |
| Tumour localisation        |                                      | < 0.001 <sup>b</sup> |
| extremities                | 0.0 (0–6)                            |                      |
| trunk                      | 2.5 (0–6)                            |                      |
| other                      | 1.0 (0–6)                            |                      |
| extremities vs. trunk      |                                      | < 0.001 <sup>c</sup> |
| extremities vs. other      |                                      | 0.066 <sup>c</sup>   |
| trunk vs. other            |                                      | 0.208 <sup>c</sup>   |
| Maximal mucositis grade    |                                      | < 0.001 <sup>b</sup> |

|                                                 |           |                      |
|-------------------------------------------------|-----------|----------------------|
| no mucositis                                    | 0.0 (0–6) |                      |
| grade 1–2                                       | 1.0 (0–6) |                      |
| grade 3–4                                       | 2.0 (0–6) |                      |
| no mucositis vs. grade 1–2                      |           | <0.001 <sup>c</sup>  |
| no mucositis vs. grade 3–4                      |           | <0.001 <sup>c</sup>  |
| grade 1–2 vs. grade 3–4                         |           | 0.166 <sup>c</sup>   |
| Median mucositis grade                          |           | < 0.001 <sup>b</sup> |
| no mucositis                                    | 0.0 (0–6) |                      |
| grade 1–2                                       | 2.0 (0–6) |                      |
| grade 3–4                                       | 5.0 (0–6) |                      |
| no mucositis vs. grade 1–2                      |           | <0.001 <sup>c</sup>  |
| no mucositis vs. grade 3–4                      |           | <0.001 <sup>c</sup>  |
| grade 1–2 vs. grade 3–4                         |           | 0.014 <sup>c</sup>   |
| Weight at diagnosis                             |           | 0.264 <sup>b</sup>   |
| normal weight                                   | 1.0 (0–6) |                      |
| underweight                                     | 1.0 (0–6) |                      |
| overweight                                      | 1.0 (0–6) |                      |
| Age in years                                    | –0.208    | < 0.001 <sup>d</sup> |
| Weight loss during therapy                      | 0.121     | 0.037 <sup>d</sup>   |
| Treatment delay in days                         | 0.140     | 0.016 <sup>d</sup>   |
| Duration of unscheduled hospitalisation in days | 0.665     | < 0.001 <sup>d</sup> |

FN, febrile neutropenia; ES, Ewing sarcoma; OS, osteosarcoma; STS, soft tissue sarcoma; G-CSF, granulocyte stimulating factor<sup>a</sup> Mann-Whitney U test; <sup>b</sup> Kruskal-Wallis-test; <sup>c</sup> posthoc Mann-Whitney U test; <sup>d</sup> Kendall's Tau-b Please note that G-CSF administration was not analysed due to the predominant use of G-CSF in Ewing sarcoma patients (see Table 1).

**Table S3.** Bivariate analysis of potential factors associated to the number of FN episodes during neoadjuvant chemotherapy in 170 patients.

| Characteristic             | Median Number of FN Episodes (Range) | p-value              |
|----------------------------|--------------------------------------|----------------------|
| Sex                        |                                      | 0.127 <sup>a</sup>   |
| male                       | 1.0 (0–6)                            |                      |
| female                     | 1.0 (0–6)                            |                      |
| Any metastases             |                                      | 0.942 <sup>a</sup>   |
| no                         | 1.0 (0–6)                            |                      |
| yes                        | 1.0 (0–6)                            |                      |
| Treatment regimen          |                                      | < 0.001 <sup>b</sup> |
| EWING 2008                 | 3.0 (0–6)                            |                      |
| EURAMOS                    | 0.0 (0–3)                            |                      |
| CWS SoTiSaR                | 1.0 (0–6)                            |                      |
| EWING 2008 vs. EURAMOS     |                                      | < 0.001 <sup>c</sup> |
| EWING 2008 vs. CWS SoTiSaR |                                      | < 0.001 <sup>c</sup> |
| EURAMOS vs. CWS SoTiSaR    |                                      | < 0.001 <sup>c</sup> |
| Tumour localisation        |                                      | < 0.001 <sup>b</sup> |
| extremities                | 0.0 (0–6)                            |                      |
| trunk                      | 2.5 (0–6)                            |                      |
| other                      | 1.0 (0–6)                            |                      |
| extremities vs. trunk      |                                      | < 0.001 <sup>c</sup> |
| extremities vs. other      |                                      | 0.066 <sup>c</sup>   |
| trunk vs. other            |                                      | 0.208 <sup>c</sup>   |
| Maximal mucositis grade    |                                      | < 0.001 <sup>b</sup> |
| no mucositis               | 0.0 (0–6)                            |                      |
| grade 1–2                  | 1.0 (0–6)                            |                      |
| grade 3–4                  | 2.0 (0–6)                            |                      |
| no mucositis vs. grade 1–2 |                                      | <0.001 <sup>c</sup>  |
| no mucositis vs. grade 3–4 |                                      | <0.001 <sup>c</sup>  |
| grade 1–2 vs. grade 3–4    |                                      | 0.166 <sup>c</sup>   |
| Median mucositis grade     |                                      | < 0.001 <sup>b</sup> |

|                                                 |                                         |                      |
|-------------------------------------------------|-----------------------------------------|----------------------|
| no mucositis                                    | 0.0 (0–6)                               |                      |
| grade 1–2                                       | 2.0 (0–6)                               |                      |
| grade 3–4                                       | 5.0 (0–6)                               |                      |
| no mucositis vs. grade 1–2                      |                                         | <0.001 <sup>c</sup>  |
| no mucositis vs. grade 3–4                      |                                         | <0.001 <sup>c</sup>  |
| grade 1–2 vs. grade 3–4                         |                                         | 0.014 <sup>c</sup>   |
| Weight at diagnosis                             |                                         | 0.264 <sup>b</sup>   |
| normal weight                                   | 1.0 (0–6)                               |                      |
| underweight                                     | 1.0 (0–6)                               |                      |
| overweight                                      | 1.0 (0–6)                               |                      |
|                                                 | Kendall's–Tau–b correlation coefficient | <i>p</i> –value      |
| Age in years                                    | –0.208                                  | < 0.001 <sup>d</sup> |
| Weight loss during therapy                      | 0.121                                   | 0.037 <sup>d</sup>   |
| Treatment delay in days                         | 0.140                                   | 0.016 <sup>d</sup>   |
| Duration of unscheduled hospitalisation in days | 0.665                                   | < 0.001 <sup>d</sup> |

FN, febrile neutropenia; ES, Ewing sarcoma; OS, osteosarcoma; STS, soft tissue sarcoma; G-CSF, granulocyte stimulating factor<sup>a</sup> Mann-Whitney U test; <sup>b</sup> Kruskal-Wallis-test; <sup>c</sup> posthoc Mann-Whitney U test; <sup>d</sup> Kendall's Tau-b; Please note that G-CSF administration was not analysed due to the predominant use of G-CSF in Ewing sarcoma patients (see Table 1).
